# Supplementary material
Source: publisher figshare collection journal article supplement (https://acs.figshare.com/ndownloader/files/4310053)
Supplement: Supplementary file 1 [file 4310053]

# Effect of the $\text{Zn}^{2+}$ and $\text{Hg}^{2+}$ ions on the structure of liquid water

*Valentina Migliorati,<sup>\*,‡</sup> Giordano Mancini,<sup>†</sup> Giovanni Chillemi,<sup>†</sup> Andrea Zitolo,<sup>‡</sup> Paola D'Angelo<sup>\*,‡</sup>*

<sup>‡</sup>Dipartimento di Chimica, Università di Roma “La Sapienza”, Piazzale Aldo Moro 5, 00185 Roma, Italy.

<sup>†</sup>CASPUR, Inter-University Consortium for Supercomputing in Research, via dei Tizii 6b, 00185 Roma, Italy.

## Supporting Information

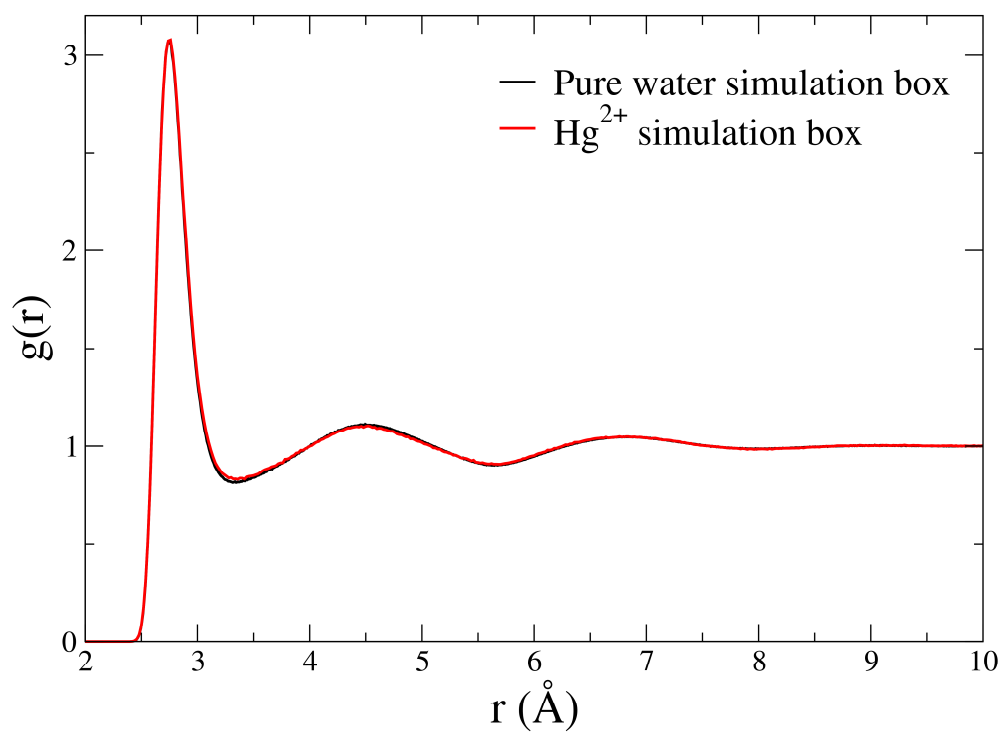

**Figure 1S.** Comparison of the oxygen-oxygen  $g(r)$ 's obtained for pure water (black line) and for the bulk water molecules of MD simulation of  $\text{Hg}^{2+}$  in water (red line).

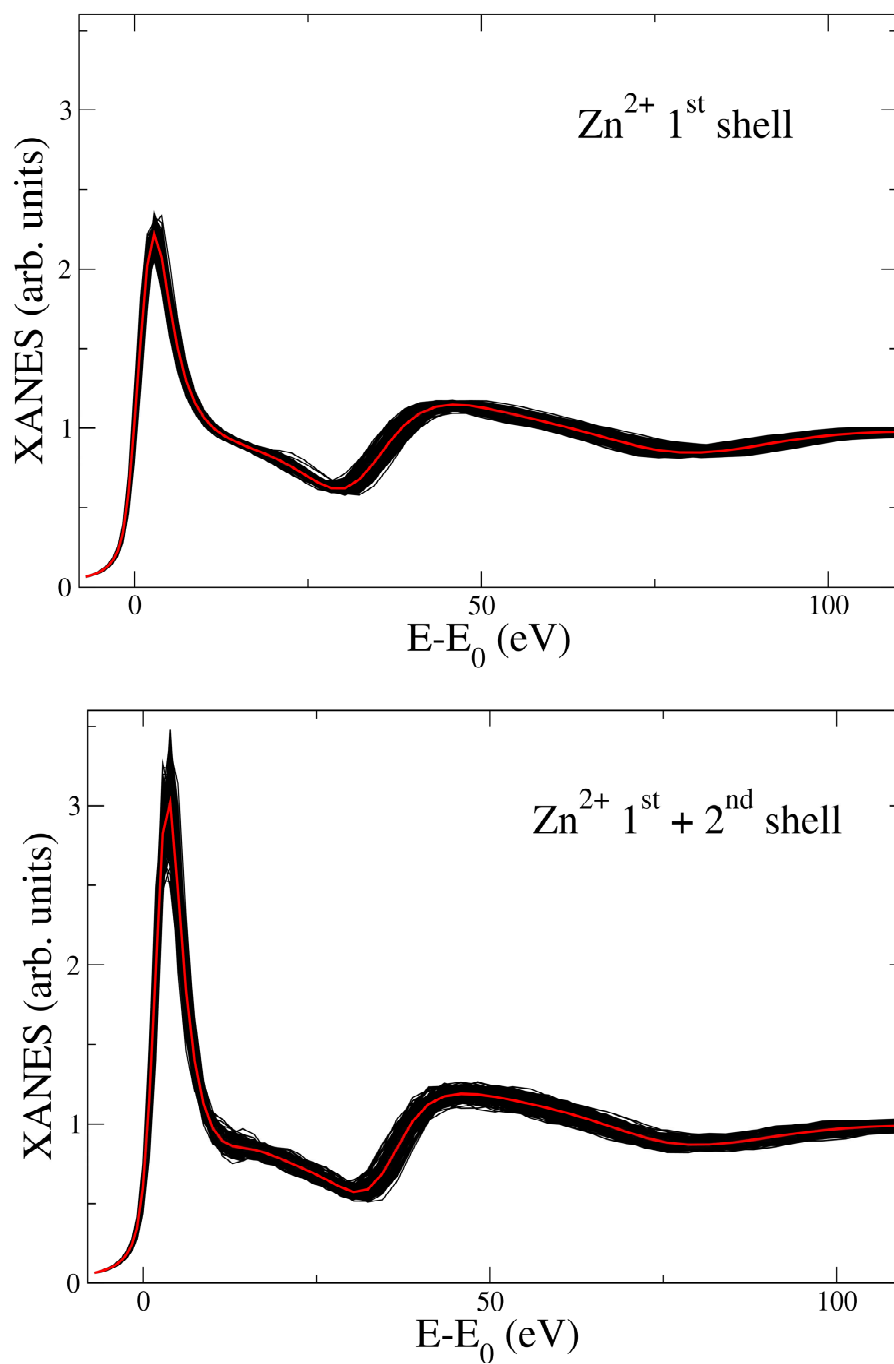

**Figure 2S.** (Upper panel) Comparison of the theoretical XANES spectrum of Zn<sup>2+</sup> obtained from the MD average including the first hydration shell only (red line) and 200 spectra associated with individual MD configurations (black lines). (Lower panel) Comparison of the theoretical XANES spectrum of Zn<sup>2+</sup> obtained from the MD average including the first plus second hydration shells (red line) and 200 spectra associated with individual MD configurations (black lines).

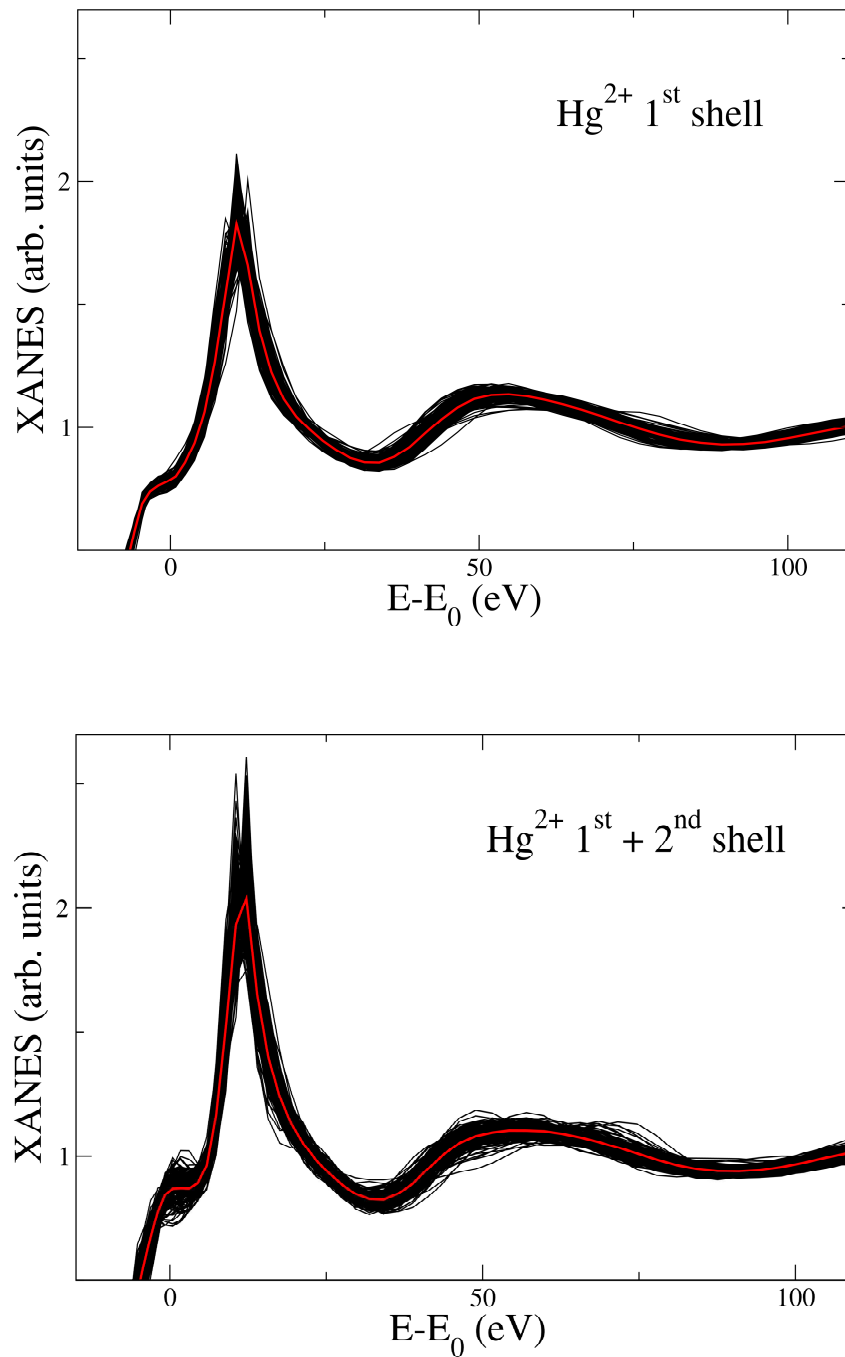

**Figure 3S.** (Upper panel) Comparison of the theoretical XANES spectrum of  $\text{Hg}^{2+}$  obtained from the MD average including the first hydration shell only (red line) and 200 spectra associated with individual MD configurations (black lines). (Lower panel) Comparison of the theoretical XANES spectrum of  $\text{Zn}^{2+}$  obtained from the MD average including the first plus second hydration shells (red line) and 200 spectra associated with individual MD configurations (black lines).

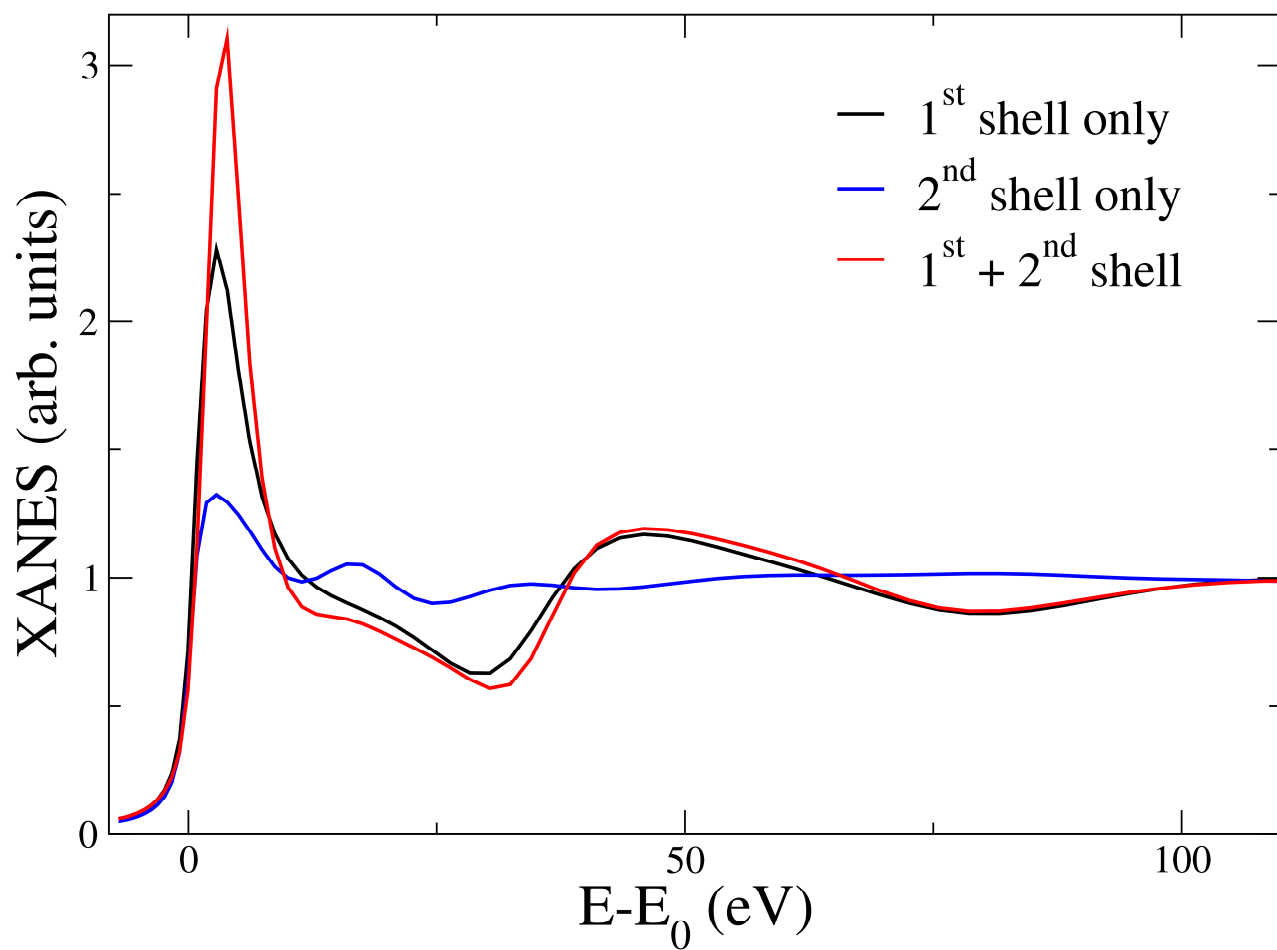

**Figure 4S.** Comparison of the theoretical XANES spectrum of  $\text{Zn}^{2+}$  obtained from the MD average including the first hydration shell only (black line), the second hydration shell only (blue line), and the first plus second hydration shells (red line).

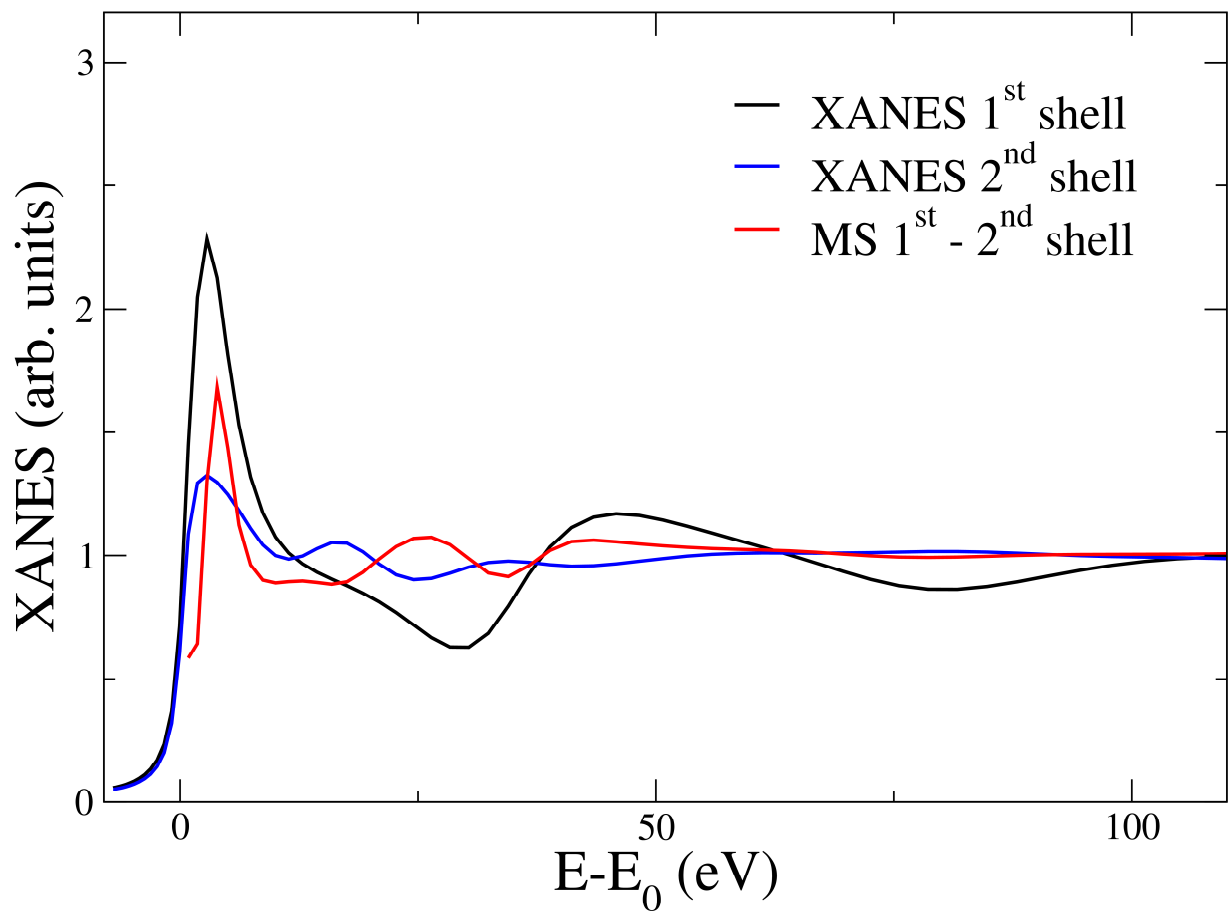

**Figure 5S.** Comparison of the theoretical XANES spectrum of  $\text{Zn}^{2+}$  obtained from the MD average including the first hydration shell only (black line), the second hydration shell only (blue line), and the spectrum obtained as the difference between the first plus second hydration shell XANES and the sum of the first hydration shell only and the second hydration shell only spectra (red line). This last spectrum represents the MS contribution associated with  $\text{Zn-O}_1\text{-O}_2$  paths where  $\text{O}_1$  is an oxygen atom of the first hydration shell and  $\text{O}_2$  is an oxygen atom of the second hydration shell.
